# Supplementary material for: The Partial Role of KLF4 and KLF5 in Gastrointestinal Tumors
Source: Gastroenterol Res Pract. 2021 Jul 27;2021:2425356. doi: 10.1155/2021/2425356 (PMC8337138; doi:10.1155/2021/2425356)
Supplement: Supplementary Materials — Supplemental 1: cell proliferation assay and Western blot method. Supplemental 2: reaction pathways involved in KLF4 or KLF5 interacting proteins (top 6). The top 25 genes in KLF4's or KLF5's PPI network. Supplemental 3: the expression levels of KLF4 and KLF5 at various pathological stages. Expression of KLF4 and KLF5 in gastrointestinal tumors based on patient gender. [file 2425356.f1.zip]

Archive with 3 entries (3 files):
- Supplemental 1.docx
- Supplemental 2.docx
- Supplemental 3.docx
